# Supplementary material for: Trade Globalization, Overseas Investment, and Tax Revenue Growth in Sub-Saharan Africa
Source: publisher site journal article supplement (doi:10.1515/econ-2022-0116), 2024-01-01
Supplement: Supplementary file 1 [file Reviews.pdf]

# Reviews of ECONJOURNAL-D-24-00124R1

TRADE GLOBALIZATION, OVERSEAS INVESTMENT AND TAX REVENUE  
GROWTH IN SUB-SAHARAN AFRICA

## Round 1

### Reviewer 1

The submission is a very good and germane title in the current milieu in the environment where it is set. The authors have been thoughtful about the title and the submission. However, the following need to be attended to: (a) bring up more theories on the title and analyse the paper using the theoretical framework of the relevant one; (b) discuss more on the results and its implication; (c) Need to clean up the language: follow the example made in the attachment.

### Reviewer 2

In this paper the author has studied the globalization of trade, foreign investment and tax revenues in Sub-Saharan Africa.

but in the model the author has not integrated and studied the exchange rate and the interest rate in the independent variables.

The author needs to study the effect of the exchange rate and the variability of these two variables on investment and globalization in Sub-Saharan Africa.

## Round 2

### Reviewer 1

Your paper has made important contribution to knowledge especially in the area of tax management in Africa where efficiency is low. Congratulations.

### Reviewer 2

the authors have successfully addressed the comments and suggestions provided by the reviewers for their manuscript.

The revised version of the paper has been submitted on the platform, incorporating all the necessary changes. Additionally, the authors have provided a detailed document outlining the modifications made in response to each of the reviewers' comments.
